# Supplementary material for: Temporal Variations of Heavy Metal Sources in Agricultural Soils in Malta
Source: MDPI journal article supplement (doi:10.3390/app12063120), 2022-03-18
Supplement: s1 [file s1]

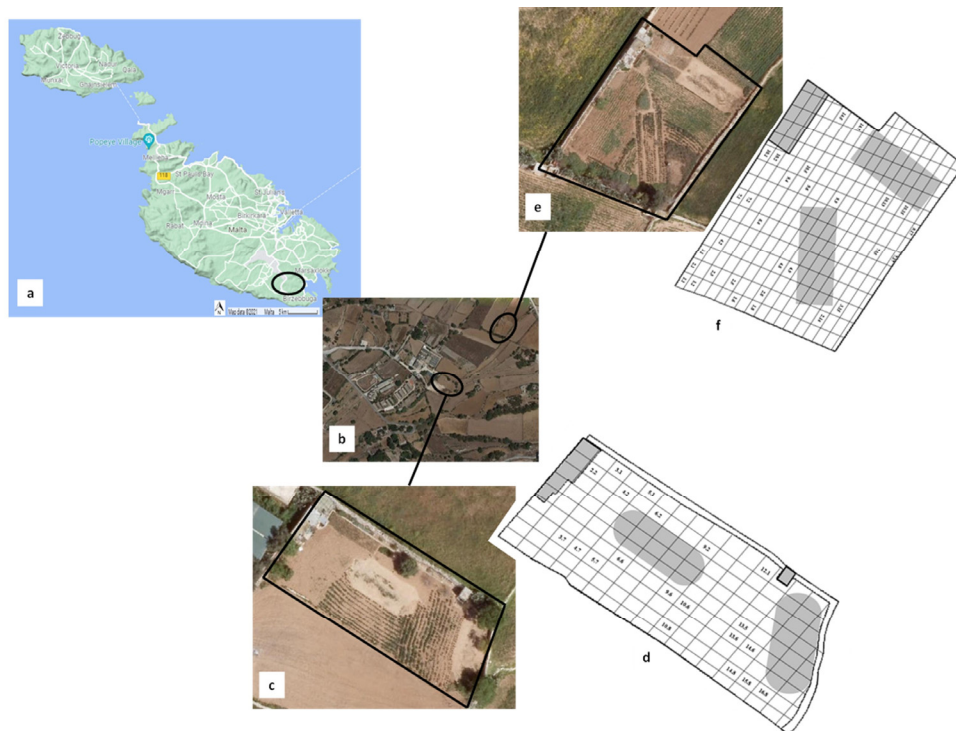

**Figure S1.** (a) Spatial location details of study area in Malta, (b) Location details of fields showing proximity of areas, (c) Aerial view of Field A, (d) Stratified random sampling grid and sampling points for Field A, (e) Aerial view of Field B, and (f) Stratified random sampling grid and sampling points for Field B.
